# Supplementary material
Source: publisher site journal article supplement (https://www.spandidos-publications.com/3965/downloadSupplementary)
Supplement: Supplementary file 1 [file downloadSupplementary]

## Sheet: Supplementary Table4_DMM_order
6.3.67.0	PamGrid Version	QuantitationType	TCC4_data_analysisDate
Table SIII. a list of top 25 highly phosphorylated peptide sites
NCC-DMM1-C1 cells								Original tumor tissue
Array ID	Uniprot ID	Sequence	Position	Uniprot	phosphositePlus	HPRD		Array ID	Uniprot ID	Sequence	Position	Uniprot	phosphositePlus	HPRD
CD79A_181_193	P11912	EYEDENLYEGLNL	[182, 188]	src	-	Lyn		CD79A_181_193	P11912	EYEDENLYEGLNL	[182, 188]	src	-	Lyn
ENOG_37_49	P09104	SGASTGIYEALEL	[44]	-	-	-		ENOG_37_49	P09104	SGASTGIYEALEL	[44]	-	-	-
EFS_246_258	O43281	GGTDEGIYDVPLL	[253]	Src	-	-		EFS_246_258	O43281	GGTDEGIYDVPLL	[253]	Src	-	-
SRC8_CHICK_476_488	Q01406	EYEPETVYEVAGA	[477, 483]	-	-	-		ART_004_EAIYAAPFAKKKXC	NA	EAIYAAPFAKKK	NA	-	-	-
ART_004_EAIYAAPFAKKKXC	NA	EAIYAAPFAKKK	NA	-	-	-		SRC8_CHICK_476_488	Q01406	EYEPETVYEVAGA	[477, 483]	-	-	-
SRC8_CHICK_492_504	Q01406	YQAEENTYDEYEN	[492, 499, 502]	-	-	-		SRC8_CHICK_492_504	Q01406	YQAEENTYDEYEN	[492, 499, 502]	-	-	-
PLCG1_764_776	P19174	IGTAEPDYGALYE	[771, 775]	Syk	Abl	EGFR, Hck, Lyn, Syk		FRK_380_392	P42685	KVDNEDIYESRHE	[387]	FRK	-	-
PAXI_111_123	P49023	VGEEEHVYSFPNK	[118]	PTK6	Abl	FAK		CDK2_8_20	P24941	EKIGEGTYGVVYK	[15, 19]	Wee1	Wee1	Wee1, CDK2
PAXI_24_36	P49023	FLSEETPYSYPTG	[31, 33]	PTK6	Abl	FAK		PLCG1_764_776	P19174	IGTAEPDYGALYE	[771, 775]	Syk	Abl	EGFR, Hck, Lyn, Syk
PDPK1_2_14	O15530	ARTTSQLYDAVPI	[9]	Src, INSR	Ret	Src		PAXI_111_123	P49023	VGEEEHVYSFPNK	[118]	PTK6	Abl	FAK
FRK_380_392	P42685	KVDNEDIYESRHE	[387]	FRK	-	-		EPHA2_765_777	P29317	EDDPEATYTTSGG	[772]	-	EphA2	-
P85A_600_612	P27986	NENTEDQYSLVED	[607]	-	-	INSR		PDPK1_2_14	O15530	ARTTSQLYDAVPI	[9]	Src, INSR	Ret	Src
PGFRB_572_584	P09619	VSSDGHEYIYVDP	[579, 581]	PDGFR-β	PDGFR-β	PDGFR-β		RET_1022_1034	P07949	TPSDSLIYDDGLS	[1029]	-	-	RET
LAT_249_261	O43561	EEGAPDYENLQEL	[255]	-	-	-		PECA1_706_718	P16284	KKDTETVYSEVRK	[713]	FER	Fyn, Lck	-
RET_1022_1034	P07949	TPSDSLIYDDGLS	[1029]	-	-	RET		RASA1_453_465	P20936	TVDGKEIYNTIRR	[460]	-	-	-
CDK2_8_20	P24941	EKIGEGTYGVVYK	[15, 19]	Wee1	Wee1	Wee1, CDK2		41_654_666	P11171	LDGENIYIRHSNL	[660]	-	EGFR	EGFR
FES_706_718	P07332	REEADGVYAASGG	[713]	FES	FES	FES		FES_706_718	P07332	REEADGVYAASGG	[713]	FES	FES	FES
PECA1_706_718	P16284	KKDTETVYSEVRK	[713]	FER	Fyn, Lck	-		P85A_600_612	P27986	NENTEDQYSLVED	[607]	-	-	INSR
FAK2_572_584	Q14289	RYIEDEDYYKASV	[573, 579, 580]	Src, Fyn, Lck	Ret	Src		EPHA1_774_786	P21709	LDDFDGTYETQGG	[781]	-	EphA1	-
NCF1_313_325	P14598	QRSRKRLSQDAYR	[324]	-	-	-		PGFRB_1014_1028	P09619	PNEGDNDYIIPLPDP	[1021]	PDGFR-β	PDGFR-β	PDGFR-β
RAF1_332_344	P04049	PRGQRDSSYYWEI	[340, 341]	Src	Src	Src		LAT_249_261	O43561	EEGAPDYENLQEL	[255]	-	-	-
EPHA2_765_777	P29317	EDDPEATYTTSGG	[772]	-	EphA2	-		VGFR2_989_1001	P35968	EEAPEDLYKDFLT	[996]	VEGFR2	VEGFR2	VEGFR2
TYRO3_679_691	Q06418	KIYSGDYYRQGCA	[681, 685, 686]	-	Tyro3	-		PAXI_24_36	P49023	FLSEETPYSYPTG	[31, 33]	PTK6	Abl	FAK
EPHA7_607_619	Q15375	TYIDPETYEDPNR	[608, 614]	EphA7	-	-		EPHB1_771_783	P54762	DDTSDPTYTSSLG	[778]	-	-	-
NTRK2_696_708	Q16620	GMSRDVYSTDYYR	[702, 706, 707]	-	NTRK2	-		PGFRB_572_584	P09619	VSSDGHEYIYVDP	[579, 581]	PDGFR-β	PDGFR-β	PDGFR-β
